# Supplementary material for: Evaluating Detection Limits of Next-Generation Sequencing for the Surveillance and Monitoring of International Marine Pests
Source: PLoS One. 2013 Sep 4;8(9):e73935. doi: 10.1371/journal.pone.0073935 (PMC3762713; doi:10.1371/journal.pone.0073935)
Supplement: Table S1 — Uncorrected genetic divergences of SSU sequences between MIS species. Genetic divergences between the 12 species listed in Table 1 and based on the V1–V3 region of SSU. aNumbers in brackets correspond to the species reference number shown in Figure 1. (XLSX) [file pone.0073935.s002.xlsx]

## Sheet: 18S_600_DistanceData.csv
Table S1. Uncorrected genetic divergences of SSU sequences between species.
Asterias amurensis (1)
Carcinus maenas (2)	0.188
Ciona intestinalis (3)	0.132	0.196
Didemnum vexillum	0.151	0.204	0.045
Eudistoma elongatum	0.3	0.336	0.249	0.258
Ciona savignyi (4)	0.21	0.235	0.168	0.162	0.246
Corbula amurensis (5)	0.157	0.179	0.16	0.16	0.275	0.213
Corbula gibba (6)	0.165	0.185	0.165	0.162	0.275	0.216	0.014
Musculista senhousia (7)	0.174	0.188	0.196	0.19	0.322	0.235	0.14	0.146
Perna canaliculus (8)	0.165	0.188	0.176	0.171	0.303	0.227	0.123	0.126	0.056
Perna perna (9)	0.168	0.185	0.179	0.174	0.305	0.224	0.12	0.123	0.059	0.003
Sabella spalanzanii (10)	0.21	0.202	0.204	0.19	0.303	0.246	0.115	0.115	0.16	0.143	0.14
Uncorrected genetic divergences between the 12 species listed in Table 1 and based on the V1-V3 region of SSU.
aNumbers in brackets correspond to the species reference number shown in Figure 1.
